1 **Title:**

2 “Another world of pain” – Athlete and Sport Physiotherapist perspectives on the unique experience of  
3 pain in sport.

4

5 **Authors**

6 Ciarán Purcell<sup>1,2,3,4,5,6</sup> Caoimhe Barry Walsh<sup>3</sup> Garrett Van Oirschot<sup>1,2</sup> Brona M Fullen<sup>1</sup> Tomás Ward<sup>6</sup>  
7 Brian M Caulfield<sup>1,2</sup>

8 <sup>1</sup>*School of Public Health, Physiotherapy and Sports Science, University College Dublin, Dublin, Ireland*

9 <sup>2</sup>*Insight SFI Research Centre for Data Analytics, Dublin, Ireland*

10 <sup>3</sup>*School of Allied Health, University of Limerick, Limerick, Ireland*

11 <sup>4</sup>*Physical Activity for Health Research Cluster, University of Limerick, Limerick, Ireland*

12 <sup>5</sup>*Sports and Human Performance Centre, University of Limerick, Limerick, Ireland*

13 <sup>6</sup>*Ageing Research Centre, University of Limerick, Limerick, Ireland*

14

15

16

17

18

19

20

21

22

23

24

25 **Abstract**

26 *Objectives:* To explore athlete's and sports physiotherapists' experiences of sports-related pain in the  
27 upper and lower limb.

28 *Methods:* Using a constructivist and pragmatic perspective we carried out focus groups comprising a  
29 deliberate criterion sample of athletes and sports physiotherapists. We used a topic guide that moved  
30 from open exploratory questions to questions focusing on the phenomena of sports-related pain in  
31 athletes. We coded, developed candidate themes and refined finalised themes using reflexive  
32 thematic analysis. A member of our research team acted as a critical friend adding additional  
33 perspectives. We followed the Consolidated Criteria for Reporting Qualitative Research (COREQ).

34 *Results:* We completed five focus groups comprising twelve athletes (n=5 female, n=7 male) and four  
35 sports physiotherapists (n=4 male) including one initial pilot (two athletes). We developed four final  
36 themes (I-IV) and nine subthemes (a-i). I) Athlete Pain Lens ( a - pain is part of being an athlete, b -  
37 pain shapes the life of an athlete) II) Exploring And Navigating Pain (c- the sports-related pain  
38 spectrum, d- making sense of pain) III) The Emotional Toll of Pain (e - challenging emotions, f - the  
39 impact of time) IV) Coping, Community and Communication (g - coping with Pain, h - influence of  
40 community and support network, i - communication-the broken key).

41 *Conclusion:* We highlighted the distinct and challenging phenomenon of sports-related pain  
42 experienced by athletes and physiotherapists. Through effective communication members of the  
43 athlete's community may recognize, and adjust to these challenges.

44 **Keywords;** 'Pain Perception', 'Musculoskeletal Pain', 'Athletic Injuries' 'Athletic Performance'  
45 'Focus Groups' 'Sports Medicine'

46

47

48

49

50 **Introduction**

51 With the rise in the commodification of athletes in elite sports and the focus on objective over  
52 subjective markers to quantify performance and health, it is more important now than ever before to  
53 listen to the voice of the athletes when they share their pain experiences before it is lost.<sup>1</sup> Despite the  
54 focus on sports-related injury and availability to compete, a spotlight on sports-related pain has  
55 emerged.<sup>2,3</sup> The International Olympic Committee (IOC) recommend a multidimensional approach to  
56 athlete pain that goes beyond traditional structure-based understanding to include aspects of pain  
57 perception and experience across five key domains: neurophysiological, biomechanical, affective,  
58 cognitive, and socioenvironmental.<sup>4</sup> Psychosocial aspects such as history of stress and coping  
59 responses have been linked with injury rates.<sup>5</sup> Furthermore, sports-specific sociocultural aspects such  
60 as attitudes and culture encouraging athletes to be “tough” and “stay in the game” have been linked  
61 to injury risk, injury rates and timely access to healthcare and treatment. The context of the pain  
62 experience has been highlighted as a key component of contemporary pain science, where the same  
63 pain experience may be interpreted as stressful or alarming in one context and as a helpful indicator to  
64 manage resources in another.<sup>6</sup>

65 Qualitative research can harness the athlete’s voice and explore the context of their experience which  
66 may ultimately lead to enhanced management strategies as has occurred in sports-related injury.<sup>7</sup>

67 Clinicians can feel underequipped when it comes to effectively understanding and assessing athlete  
68 pain.<sup>8</sup> Traditionally, qualitative research has focused on the separate experiences of athletes and  
69 clinicians when it comes to pain, much of which has focused on low back pain.<sup>9,10</sup> To truly understand  
70 the sports-related pain phenomenon whilst preserving the voice of the athlete there is a need to gather  
71 both athletes’ and physiotherapists’ shared definitions and experiences.

72 We aimed to explore athlete and sports physiotherapists shared experiences and perspectives of upper  
73 and lower limb pain in a sporting context through mixed focus groups.

74

75

76 **Methods**

77 We conducted a qualitative study with mixed focus groups combining athletes and sports  
78 physiotherapists and followed the consolidated criteria for reporting qualitative research (COREQ).<sup>11</sup>  
79 Ethical permission was granted for our study by the UCD Human Research Ethics Committee. (LS-  
80 22-40-Purcell-Caulfield)

81 **Positionality statement**

82 As a sports physiotherapist and clinician my (CP) move to research was one inspired by pragmatism  
83 and constructivism drawing on the relevant knowledge from elements of empirico-analytical,  
84 interpretive and critical research paradigms.<sup>12,13</sup> My motivation stems from investigating solutions to  
85 real-world problems and clinic queries where the best method is often the one that works. I recognise  
86 the need for hearing the patient's (athlete's) voice. My doubts, assumptions and beliefs drive my  
87 position of a value-driven axiology.<sup>14</sup> I recognise that being a sports physiotherapist and PhD  
88 researcher influences discussions.<sup>12</sup> I embrace my position to understand athletes' and clinicians'  
89 upper and lower limb pain experiences through taking a reflexive approach.<sup>15</sup> Alongside eight years of  
90 clinical experience assessing and treating athletes, I (CP) have gained qualitative research experience  
91 through an MSc in Sports Physiotherapy. GvO (moderator) is a PhD candidate and sports  
92 physiotherapist with seventeen years of experience. BC (neutral observer), is a Professor in  
93 physiotherapy with twenty years of research experience. CBW, (critical friend) is a physiotherapist  
94 and PhD researcher in the field of chronic conditions with experience in the conduct of focus groups.

95 **Participants**

96 We recruited a deliberate criterion sample. We sought athletes spread across multiple sports of  
97 varying ages, genders and competition levels, with experience of an upper or lower limb pain episode  
98 requiring sports physiotherapist assessment within the last year. We recruited sports physiotherapists  
99 with three or more years of experience currently working with athletes weekly from a range of clinical  
100 and sports settings. The notion of data saturation has been contested given that data and themes are

101 generated through interpretation and there can be no objective point at which no new themes  
102 “emerge” in an active constructivist approach.<sup>16</sup> Therefore, we ceased sampling when sufficient depth  
103 of information on sports-related pain experience was gathered. We recruited athletes through  
104 university sports clubs and local sports clubs’ email and communication channels. We contacted  
105 sports physiotherapists registered with the Irish Society of Chartered Physiotherapists Sports and  
106 Exercise Medicine Group (CPSEM) working across a variety of sports and settings email channels  
107 and networks. We offered participants their preference of either a fully face-to-face or fully online  
108 (zoom) focus group.

### 109 **Protocol**

110 We sent participants a pre-participation questionnaire to capture background demographics, sporting  
111 context and pain history. We collected information from physiotherapists relating to their experience  
112 working in and participating in sports and any additional sports physiotherapy-related qualifications.  
113 We used a step-by-step approach which included: brainstorming, ordering, timing and phrasing of  
114 questions, obtaining feedback from peers, revising and piloting to develop the topic guide for the  
115 focus groups.<sup>17</sup> The topic guide moved from broad introductions and context to more focused  
116 questions concerning athlete pain definitions, understandings and experiences.(Appendix A) Two  
117 hours were allocated to cover all questions which were open and encouraged interaction between  
118 participants. We altered the sequencing of questions between focus groups in line with an iterative  
119 and reflexive approach.<sup>18</sup> We commenced each focus with ground rules focusing on confidentiality,  
120 equity and respect for diverse views and opinions and we requested that athletes share their opinions  
121 before physiotherapists to moderate the power imbalance. We endeavoured to separate athletes and  
122 physiotherapists who previously worked together. We completed audio recordings of all focus groups  
123 to facilitate transcription.

### 124 **Data Analysis**

125 We transcribed the focus groups verbatim and published the uncoded and anonymised dataset in an  
126 online repository. (10.17632/t47tw94mzd.) Using a thematic analysis approach we began our data

127 analysis following the initial pilot focus group informing sampling, data collection and analysis for  
128 subsequent focus groups in an iterative manner. I, (CP) read the transcripts in their entirety, added  
129 initial observations and notes and subsequently carried out initial coding of the entire transcripts (both  
130 semantic and latent). One-third of the transcripts were given to CBW to code independently. We  
131 discussed, compared and refined initial codes using a critical friend approach to incorporate breadth  
132 and variation in perspectives.<sup>19</sup> CP then reread transcripts and updated coding where necessary before  
133 codes were compared, with similar codes being highlighted and grouped to form rough clusters of  
134 candidate themes. The team reviewed candidate themes in the context of the research and considered  
135 the data available to support each theme. We merged some themes and adjusted others at this  
136 refinement stage. We applied titles and developed a final thematic map.

### 137 **Patient & Public Involvement**

138 A convenience group of five athletes, (female: n=3, male: n=2) from a range of competition levels  
139 and sports formed a PPI panel for this research project. They reviewed and commented on the  
140 research questions, topic guide and information provided to participants before the focus groups  
141 ensuring adequate athlete representation and appropriate participant burden. Their feedback was  
142 incorporated into the design and delivery of the final focus groups and their input was sought in the  
143 presentation of the final results and the inclusion of the final results in an initial Delphi survey which  
144 will inform the development of a set of athlete pain assessment guidelines.

### 145 **Equality, Diversity & Inclusion.**

146 Participants across gender, age, competition level and sport were sought for this study, our purposive  
147 sampling included local clubs both within and outside of the University setting facilitating diversity of  
148 the sample from an age and socioeconomic demographic perspective. We offered face-to-face as well  
149 as Zoom focus group options to increase accessibility. Our research team span a range of experiences  
150 and backgrounds.

151

152 **Results & Discussion**

153

| PARTICIPANTS     | N  | FEMALE | MALE | SPORT (N)                                                                                                                               | COMPETITION LEVEL (N)                                                                   | PHYSIOTHERAPY BACKGROUND (N) | ATHLETE BACKGROUND (N)                       |
|------------------|----|--------|------|-----------------------------------------------------------------------------------------------------------------------------------------|-----------------------------------------------------------------------------------------|------------------------------|----------------------------------------------|
| ATHLETES         | 12 | 5      | 7    | Athletics (5) Tag Ruby (1)<br>Field Hockey (1) Soccer (2),<br>Cycling (1) Mixed Martial<br>Arts (1) Gaelic Football &<br>Basketball (1) | Professional/International<br>(1) Semi-Professional (2)<br>Elite Amateur (9)            | Yes (5)<br><br>No (7)        | NA                                           |
| PHYSIOTHERAPISTS | 4  | -      | 4    | Athletics (1), Rugby (1),<br>Gaelic Football & Hurling (2),<br>Mixed Sports in Private<br>Practice (3)                                  | Professional/International<br>(2) Mixed Competition<br>level in Private Practice<br>(3) | NA                           | Current Athletes (2)<br>Retired Athletes (2) |

154 **Table 1 – Participant Demographics**

155

156 Five of the athletes had a background in physiotherapy practice (studying or practising physiotherapy  
 157 across various settings). All physiotherapists were either current or previous athletes. We assigned  
 158 athletes and physiotherapists alphanumeric participant IDs beginning with the letter “A” or “P”  
 159 respectively. Participant IDs were known only to CP, the lead researcher. Once participant IDs were  
 160 allocated and analysis was complete all records of participant information were deleted ensuring  
 161 anonymity. Athletes and physiotherapists discussed and explored shared experiences and concepts  
 162 and so we merged the data for coding and analysis purposes. We identified codes in (i) athletes only,  
 163 (ii) physiotherapists only and (iii) both athletes and physiotherapists. Figure 1 displays the final  
 164 themes and the corresponding codes assigned to each theme. Figure 2 is a thematic map of the themes  
 165 and subthemes relevant to sports-related pain.

166

167 **Figure 1– Themes and codes inserted here.**

168

169

170 **Figure 2 – Athlete Pain Themes & Subthemes inserted here**

171

172 **Theme 1. The Athlete Pain Lens**

173 Theme 1 includes two subthemes; 1.1 – pain is part of being an athlete and 1.2 – pain impacts and  
174 shapes the life of an athlete.

175

176 ***1.1 Pain is part of being an athlete***

177 Participants shared how pain is an inherent aspect of being an athlete, shaping their identity. The  
178 interaction between pain, exertion and fitness is an enmeshed aspect of sports-related pain experience  
179 with athletes acknowledging that pain or muscle soreness can be a sign of effort towards the  
180 attainment of fitness. In line with contemporary research, playing through pain whether it be exertion-  
181 related or otherwise was commonplace behaviour reported by both sports physiotherapists and  
182 athletes albeit with potentially negative consequences.<sup>20</sup> The main concern athletes had was the  
183 impact pain has on their performance, particularly during competitive parts of the season.  
184 Physiotherapists also acknowledged the impact the time of the season has on pain behaviours.

185 *“I find that you live with pain. It’s not that you wait for the day for pain to come or go.”*

186 *– A01*

187 *“I’m happy to run through pain all summer and just my only worry is that it impacts*  
188 *performance.” – A08.*

189 *“Because depending on time of season, what’s coming up, .. changes someone’s, maybe not*  
190 *how they experience pain but certainly how far they’re willing to take it.” – P04*

191



192

193 ***1.2 Pain impacts and shapes the life of an athlete.***

194 Athletes and Physiotherapists alike defined pain as something that influences an athlete’s ability to  
195 participate and perform in their sport. Athletes described how pain also impacts their daily life outside  
196 of sports with the combination of the physical and emotional experience having the potential to  
197 influence their identity. Previous research has documented how the impact of pain on daily life and  
198 mental wellness can force athletes to contemplate their future in sport, something one athlete in this  
199 study resonated with.<sup>21</sup>

200 *“I suppose physical pain can often translate into being an emotional pain, not being able to*  
201 *participate can change the life of an athlete.” – A04*

202 *“It happens me all day, every day, there’s times that I limp because of it and I can’t walk. I’ve*  
203 *had to adjust my lifestyle. I can’t wear certain shoes, I can’t just ..run for a bus I need a good long*  
204 *warm up and I am meant to be an athlete.” – A08*

205 *“I’m able to run through it but it causes me so much pain that I contemplate retiring.” – A08*

206 **Theme 2. Exploring And Navigating Pain**

207 Theme 2 includes two subthemes; 2.1 – the sports-related pain spectrum and 2.2 – making sense of  
208 pain. Athletes experience a variety of unique pain encounters. They interpret and learn about their  
209 pain to determine whether each pain episode is part of the normal pain experience, or if it is  
210 associated with potential injury and subsequently warrants action.<sup>20,22</sup> Pain is neither predictable nor  
211 repeatable. The abundance of available information through the internet and various sources is often  
212 more of a hindrance than a help. Athletes appear to have more competition for their attention than  
213 previous generations, as discussed by coaches of Generation Z athletes.<sup>23</sup> All of these aspects  
214 contribute to a complex phenomenon that is not easily understood and warrants greater attention,  
215 appreciation and representation.

216

217 **2.1 The sports-related pain spectrum.**

218 In line with contemporary research, pain experience existed along a spectrum for athletes and  
219 physiotherapists alike who described a variety of pain presentations from routine training-related  
220 muscle soreness, to “niggles”, to pain that is more sinister and may be a cause for concern.<sup>24</sup> Pain  
221 perception has both sensory and emotional aspects that, participants described, are influenced by a  
222 multitude of sports-related activities from a routine warm-up to the rush of adrenalin and intense  
223 focus experienced when competing.<sup>22</sup> This situational and contextual pain perception served the  
224 purpose of deferring the pain experience and facilitating athletes' performance during competition.

225 *“It kind of has physical implications and psychological as well yeah”. – A11*

226 *“For the majority of anything from a niggle to an injury, if you warm up you can still run on*  
227 *it.” – A01*

228 *“The adrenaline of it all takes over I’m able to finish the rep or finish the race but as soon as*  
229 *I stepped off the track, I said to my coach on both occasions like ah somethings gone wrong.” –*  
230 *A08*

231 **2.2 Making sense of pain**

232 Differentiating between pain and injury is a challenge athletes and physiotherapists often grapple  
233 with. In many cases, injuries may be indicated by pain whilst in others it is not. The amount and  
234 intensity of pain an athlete perceives are influenced factors beyond tissue damage, something which  
235 athletes and physiotherapists found frustrating to reconcile.<sup>4</sup>

236 *“That is something I definitely struggle with from an athlete perspective is when does pain*  
237 *become something that stops you from competing...as opposed to finding that place where you know*  
238 *it’s safe to continue.” – A12*

239                   *“I don’t think it relates to pain, I don’t think pain relates to level of injury, I think it’s a very*  
240                   *loose connection to make, especially an acute injury.” – P04*

241 Exploring the meaning of pain, athletes and physiotherapists acknowledged the individual nature of  
242 pain enlisting individual pain descriptions and language to describe their experiences. Accurately  
243 representing pain required consideration and time for reflection with successful communication  
244 hinging on the physiotherapist understanding and valuing the athlete's unique lexicon.

245                   *“I think everyone kind of expresses themselves differently.” – A11*

246                   *“I suppose as long as your physio understands your language, that’s the key thing and that’s*  
247                   *where the relationship with your physio is actually kind of important.” – P03*

248 Contributing to feelings of frustration, athletes are also faced with an abundance of information from  
249 different sources. The availability of large swathes of information makes it difficult to identify the  
250 most important elements and operating in a contemporary world adds additional complexity<sup>23</sup>  
251 Athletes and physiotherapists discussed how the internet, social media and data derived from  
252 wearable technologies might provide a source of helpful information but often exacerbates the  
253 dilemma of deciphering pain due to the nature of comparison on social media and the abundance of  
254 non-evidence based information, particularly for athletes who have poorer levels of digital health  
255 literacy.

256                   *“I think people get really confused about the whole situation, they’ve read stuff, they’ve*  
257                   *probably been to other practitioners before, they’ve gone around the mill so they can be a little bit of*  
258                   *a challenge in terms of figuring out where they are from both a pain point of view, function point of*  
259                   *view.” – P03*

260                   *“Like Instagram and people influencing you and you know like I was changing exercises*  
261                   *every single day trying to solve my pains ... the stress and the thought process.” – A07*

262 Despite the challenges, athletes valued the protective role pain plays and were intrigued to learn more  
263 both about, and from, their pain. Pain acted as a warning sign or indicator that athletes and  
264 physiotherapists used when deciding which pain and load management strategies to apply.

265 *“But for me, it’s kind of a feedback mechanism for the injuries to kind of guide me on what I*  
266 *can and can’t do. If the body signals to kind of back off on things and try to kind of use it as a guide*  
267 *or to teach you how far to push things with injuries and stuff.” – A09*

268

### 269 **Theme 3. The Emotional Toll Of Pain**

270 Theme 3 includes two subthemes; 3.1 – challenging emotions and 3.2 – the impact of time on the  
271 emotional aspects of pain. Athletes experience a range of emotions expressing the challenges and  
272 psychological toll of navigating pain.<sup>22</sup> Guilt, worry, fear, frustration, and doubt are part of the pain  
273 experience. These emotions were also observed in sports-related pain in this study and were related to  
274 an athlete’s inability to participate and perform in their given sport and indeed daily life activities.<sup>25</sup>  
275 These emotions tended to progress insidiously, with time highlighting and heightening the  
276 psychological aspects of pain.<sup>20</sup>

#### 277 **3.1 Challenging emotions**

278 Athletes reported they often feel worried and anxious owing to the lack of certainty of the potential  
279 causes, consequences and outlook of pain. Pain persisting beyond expected timeframes encroached on  
280 everyday life and heightened concerns. Pain and feelings of doubt negatively impacted athletes’  
281 capacity to make sense of and manage their pain effectively. Fear, doubt and frustration were often  
282 synonymous with athletes’ experiences of pain and emotions have previously been found to impact an  
283 athlete's ability to maintain activity levels when injured.<sup>26</sup> Athletes spoke about how they fear pain  
284 intensifying and are acutely aware of the impending impact it may pose on their ability to participate  
285 in sport. At times, the inertia accompanied by this cocktail of emotions left athletes feeling guilty for  
286 not being more proactive and blaming themselves for their situation.



309 Theme 4 includes three subthemes; 4.1 – coping with pain 4.2 – influence of community and support  
310 networks and 4.3 – communication, the broken key.

#### 311 ***4.1 Coping with pain***

312 Applying transferable skills acquired in their sports, athletes discussed using a variety of coping  
313 strategies including managing their attention and maintaining their fitness with non pain-provoking  
314 cross-training modalities. Athletes can use the additional time to reflect and foster other interests and  
315 hobbies away from their sport which may help manage stress, an important aspect of pain  
316 management.<sup>5</sup> Athletes acknowledged the often-unrelenting nature of the pursuit of excellence within  
317 sport and the opportunities afforded during pain and injury.

318 *“Sometimes you just want to ignore pain and just get through it or whatever.” - A05*

319 *“Just kind of did my own thing, kind of eased off..worked around it because I do kind of a broad  
320 range of stuff like and almost always work around injuries” – A09*

321 *“You have other parts of your life that you can focus on like you’re able to focus on different types of  
322 training .. and like for example I really enjoy gardening so like whenever I’m injured, I tend to go and  
323 garden more because well I can’t train but also it’s a really nice outlet for me to relieve some of that  
324 stress.” – A08*

#### 325 ***4.2 Influence of community and support networks***

326 Understanding and managing pain can be a solitary pursuit however athletes identified that they are  
327 part of a wider community. Relationships with friends, family, partners, teammates, colleagues,  
328 coaches and healthcare practitioners play a pivotal role in athletes understanding, managing and  
329 coping with pain.<sup>27</sup> Emotional support for athletes came from personal relationships and teammates  
330 who were often the most appropriately positioned to offer context-specific empathy and advice.  
331 Conversely, athletes involved in individual sports were acutely aware of the void of comradery.

332 *“My current partner .. she was just like .. go back and get some sleep and take care of yourself for a*  
333 *few weeks.” – A10*

334 *“The players we all live together they are the ones who would probably check in on you more in that*  
335 *aspect .. asking you from the perspective of how you are feeling about it.” – A05*

336 *“I think it’s better that if you’re in a team sport, you could talk to some of your teammates like A02*  
337 *could. Like it’s sometimes hard on your own.” – A01*

338 Athletes described how they spend a significant amount of time with coaches with relationships  
339 developing over years in many cases. The support an athlete feels from their coach is inextricably  
340 linked to the coach’s attitude to pain.<sup>25</sup> Participants discussed how some coaches tend to ignore pain,  
341 focusing on return to play whilst others respond to pain acknowledging the impact it has on the athlete  
342 and the strategies needed to best manage it. Physiotherapists acknowledged the integral role coaching  
343 staff play in managing athlete pain, investing time in explaining the complexities behind return-to-  
344 play timelines and the variable nature of pain that is unique to each athlete.

345 *“The coaches very rarely ever asked about how are you getting on, how are you dealing with*  
346 *it, it was always just when are you back. So, they don’t tend to look at you as much as a person and*  
347 *ask you about how you are getting on with it and how are you feeling about it.” – A05*

348 *“Because in different scenarios management play a huge role in it like is there somebody that*  
349 *is going to look and say you know, we’ll sit you out this game or you don’t have to train Wednesday*  
350 *but you’re still playing Saturday or trying to get a balance.” – A07*

351 *“I find I spend a lot of time actually educating managers on injuries and the likely timeframes*  
352 *and how that might change depending on how they’re doing.” – P02*

353

354 **4.3 Communication – the broken key.**

355 Central to successful and supportive relationships is effective communication regarding the  
356 experience of pain.<sup>27</sup> Physiotherapists and athletes spoke about how they work together and with other  
357 members of an interdisciplinary team at various stages throughout the pain journey. Adequately  
358 reporting and describing pain to clinicians was often challenging for athletes owing to the time  
359 constraints of clinical and sports-based assessments. Both athletes and physiotherapists described how  
360 frustration can build in persisting pain presentations or when the cause of pain is unclear.

361 *“Because I, actually, before I go into a physio, I do write down what I’m going to say,*  
362 *because more often than not I’d leave forgetting to mention things and you’re like, oh god, well it’s*  
363 *gone now and I’m never going to say anything.” – A11*

364 Athletes and physiotherapists discussed how physicians often sit at the top of the decision-making tree  
365 when it comes to managing athlete pain medically. As a result, some athletes find the decisive nature  
366 of these clinical decision making interactions refreshing, providing clarity. In stark contrast, athletes  
367 can also find interactions with physicians limiting and reductionist, with physiotherapists also  
368 echoing this frustration.

369 *“Whenever I feel pain, I go to the Doctor and they confirm what my pain was and I’m*  
370 *reassured that what I felt was real and then I follow the rehab protocol.” – A08*

371 *“That’s very hard .. yes this pain like that thing in my foot I’m like I’ve had this years ..how*  
372 *do you get a sports doc to see that beyond just the MRI and what it shows you?” – A08*

373 *“With the doctor instead of constantly saying to everyone we’ll just MRI your back maybe*  
374 *they start to get a bit better too at knowing who they should be referring for medical imaging because*  
375 *we’re picking up the bloody pieces after it..” – P02*

376 Athletes shared how in sport, the pressure to perform and rapidly return to play, a deep sense of  
377 responsibility to teammates and playing through pain culture can be at odds with the time and space  
378 needed to effectively communicate the pain experience within their support network. Physiotherapists  
379 also noted the effect the team dynamic of sport has on an athlete negotiating their pain.



380                   *“The team environment and how competitive it was at the time, you couldn’t really say to the*  
381                   *management unless it got to a point where like there’s fairly you know something sinister or*  
382                   *something” – A07.*

383                   *“There is a little bit of a sense of community, teammates and stuff that’s going on as well*  
384                   *where ‘who am I letting down?’ ..so you know.” – P03*

385       When communication and the ensuing support are hampered, athletes found that their resources for  
386       coping are reduced and the likelihood of seeking medical and surgical interventions can increase.  
387       Conversely, when communication is effective, collaborative decision-making can occur with  
388       comprehensive pain management plans being devised. This was often accompanied by a more  
389       positive outlook with athletes reporting feelings of acceptance and empowerment as key markers of  
390       moving forward and coping with pain.

391                   *“Until you kind of accept it and then you sort of say to yourself okay right, what’s my path to*  
392                   *recovery? I think you’re at nothing with most injuries to be honest like you have to have that level of*  
393                   *acceptance.” – A09*

394       Athletes resourcefully employ a range of strategies to improve their understanding and manage their  
395       pain. An athlete’s personal, sporting, and medical community forms an ecosystem which offers  
396       additional strategies beyond those available on an individual level. Accessing these strategies often  
397       hinges on effective communication between the athlete and their support network.<sup>28</sup> The importance  
398       of communication between athletes, their coaching staff and clinicians is well documented and  
399       impacts performance and injury rates as well as the athlete pain experience.<sup>29</sup>

400

401

402

403

404

405

406

## 407 **Clinical & Research Implications**

408 Sports-related pain is a complex experience unique to each athlete that requires interpretation and can  
409 be challenging to understand, cope with and manage. All members of the wider athlete support  
410 network (including coaching, sports science and sports medicine) must appreciate the significant  
411 impact of pain on performance and quality of life and recognise the steps we can all take to help  
412 athletes make sense of their pain and manage it more effectively This includes appreciating the  
413 spectrum of contextual factors presented in this paper. There is scope for future work to explore the  
414 sports-related pain assessment experiences and priorities of both athletes and physiotherapists to  
415 improve assessment and indeed treatment and management selection.

## 416 **Limitations**

417 Whilst every effort was made to collect experiences from a diverse range of athletes and  
418 physiotherapists and variety was achieved in sport, competition level and practice setting, the  
419 experiences gathered from these focus groups may not apply to all athlete pain settings. Notably,  
420 participants were all recruited from Ireland and whilst some of the female athletes also had a  
421 physiotherapy background no female sports physiotherapists were available to participate.

## 422 **Conclusion**

423 This paper presents four key themes (Athlete Pain Lens; Exploring and Navigating Pain; The  
424 Emotional Toll; Coping, Community and Communication), capturing the unique entity of athlete pain  
425 experience through combined focused groups of athletes and sports physiotherapists.

426

427

428

429

430

431 **What is already known on this topic?**

- 432 - Pain is a complex biopsychosocial experience that is prevalent in athlete's influencing  
433 performance and quality of life

434 **What this study adds.**

- 435 - Sports-related pain is unique to each athlete forming part of their identity.  
436 Sport-related pain poses challenges for athletes and Physiotherapists to interpret, diagnose  
437 and manage and is influenced by a range of emotions and contextual factors that can be  
438 addressed in a comprehensive biopsychosocial model of pain assessment and management.

439 **How this study might affect research practice or policy.**

- 440 - Clinicians and athlete support staff can consider the range of internal (emotional, cognitive)  
441 and external (socioenvironmental and support networks) contextual factors influencing the  
442 experience of pain in athletes and appreciate the challenges this and the influence effective  
443 communication can have. There is scope for future research to explore the unique nature of  
444 the athlete pain assessment

445

446 **Acknowledgements**

447 A huge thank you to Alison Keogh and Aisling Lacey for their consultation and expertise in  
448 qualitative research methods in sport and exercise.

449

450

451

452

453

454 **References**

- 455 1. Zanin AC. Structuring bodywork: control and agency in athlete injury discourse. *Journal of*  
456 *Applied Communication Research* 2018; **46**(3): 267-90.
- 457 2. Caneiro JP, Alaiti RK, Fukusawa L, Hespanhol L, Brukner P, O'Sullivan PP. There is more to  
458 pain than tissue damage: eight principles to guide care of acute non-traumatic pain in sport. *British*  
459 *Journal of Sports Medicine* 2021; **55**(2): 75-7.
- 460 3. Hoegh M, Stanton T, George S, Lyng KD, Vistrup S, Rathleff MS. Infographic. Pain or  
461 injury? Why differentiation matters in exercise and sports medicine. *British Journal of Sports*  
462 *Medicine* 2022; **56**(5): 299-300.
- 463 4. Hainline B, Derman W, Vernec A, et al. International Olympic Committee consensus  
464 statement on pain management in elite athletes. *Br J Sports Med* 2017; **51**(17): 1245-58.
- 465 5. Ivarsson A, Johnson U, Andersen MB, Tranaeus U, Stenling A, Lindwall M. Psychosocial  
466 Factors and Sport Injuries: Meta-analyses for Prediction and Prevention. *Sports Medicine* 2017; **47**(2):  
467 353-65.
- 468 6. Caneiro JP, Smith A, Bunzli S, Linton S, Moseley GL, O'Sullivan P. From Fear to Safety: A  
469 Roadmap to Recovery From Musculoskeletal Pain. *Physical Therapy* 2022; **102**(2).
- 470 7. Bolling C, Mellette J, Pasman HR, Van Mechelen W, Verhagen E. From the safety net to the  
471 injury prevention web: applying systems thinking to unravel injury prevention challenges and  
472 opportunities in Cirque du Soleil. *BMJ Open Sport & Exercise Medicine* 2019; **5**(1): e000492.
- 473 8. Synnott A, O'Keefe M, Bunzli S, Dankaerts W, O'Sullivan P, O'Sullivan K. Physiotherapists  
474 may stigmatise or feel unprepared to treat people with low back pain and psychosocial factors that  
475 influence recovery: a systematic review. *J Physiother* 2015; **61**(2): 68-76.
- 476 9. Wilson F, Ng L, O'Sullivan K, et al. 'You're the best liar in the world': a grounded theory  
477 study of rowing athletes' experience of low back pain. *Br J Sports Med* 2021; **55**(6): 327-35.
- 478 10. Fawcett L, Heneghan NR, James S, Rushton A. Perceptions of low back pain in elite  
479 gymnastics: A multi-disciplinary qualitative focus group study. *Phys Ther Sport* 2020; **44**: 33-40.
- 480 11. Tong A, Sainsbury P, Craig J. Consolidated criteria for reporting qualitative research  
481 (COREQ): a 32-item checklist for interviews and focus groups. *International Journal for Quality in*  
482 *Health Care* 2007; **19**(6): 349-57.
- 483 12. Korstjens I, Moser A. Series: Practical guidance to qualitative research. Part 2: Context,  
484 research questions and designs. *European Journal of General Practice* 2017; **23**(1): 274-9.
- 485 13. Fossey E, Harvey C, McDermott F, Davidson L. Understanding and Evaluating Qualitative  
486 Research. *Australian & New Zealand Journal of Psychiatry* 2002; **36**(6): 717-32.
- 487 14. Saunders M, Lewis P, Thornhill A, Bristow A. "Research Methods for Business Students"  
488 Chapter 4: Understanding research philosophy and approaches to theory development. 2019: 128-71.
- 489 15. Braun V, Clarke V. Reflecting on reflexive thematic analysis. *Qualitative Research in Sport,*  
490 *Exercise and Health* 2019; **11**(4): 589-97.
- 491 16. Braun V, Clarke V. To saturate or not to saturate? Questioning data saturation as a useful  
492 concept for thematic analysis and sample-size rationales. *Qualitative Research in Sport, Exercise and*  
493 *Health* 2021; **13**(2): 201-16.
- 494 17. Kallio H, Pietilä A-M, Johnson M, Kangasniemi M. Systematic methodological review:  
495 developing a framework for a qualitative semi-structured interview guide. *Journal of Advanced*  
496 *Nursing* 2016; **72**(12): 2954-65.

- 497 18. Moser A, Korstjens I. Series: Practical guidance to qualitative research. Part 3: Sampling,  
498 data collection and analysis. *European Journal of General Practice* 2018; **24**(1): 9-18.
- 499 19. Smith B, McGannon KR. Developing rigor in qualitative research: problems and  
500 opportunities within sport and exercise psychology. *International Review of Sport and Exercise*  
501 *Psychology* 2018; **11**(1): 101-21.
- 502 20. Barrette A, Harman K. Athletes Play Through Pain-What Does That Mean for Rehabilitation  
503 Specialists? *J Sport Rehabil* 2020; **29**(5): 640-9.
- 504 21. Sanders G, Stevinson C. Associations between retirement reasons, chronic pain, athletic  
505 identity, and depressive symptoms among former professional footballers. *European Journal of Sport*  
506 *Science* 2017; **17**(10): 1311-8.
- 507 22. Raja SN, Carr DB, Cohen M, et al. The revised International Association for the Study of  
508 Pain definition of pain: concepts, challenges, and compromises. *Pain* 2020; **161**(9): 1976-82.
- 509 23. Gould D, Nalepa J, Mignano M. Coaching Generation Z Athletes. *Journal of Applied Sport*  
510 *Psychology* 2020; **32**(1): 104-20.
- 511 24. Lacey A, Whyte E, O’Keeffe S, O’Connor S, Burke A, Moran K. The Running Injury  
512 Continuum: A qualitative examination of recreational runners’ description and management of injury.  
513 *PLOS ONE* 2023; **18**(10): e0292369.
- 514 25. Bolling C, Delfino Barboza S, Van Mechelen W, Pasman HR. How elite athletes, coaches,  
515 and physiotherapists perceive a sports injury. *Translational Sports Medicine* 2019; **2**(1): 17-23.
- 516 26. Fischerauer SF, Talaei-Khoei M, Bexkens R, Ring DC, Oh LS, Vranceanu AM. What Is the  
517 Relationship of Fear Avoidance to Physical Function and Pain Intensity in Injured Athletes? *Clin*  
518 *Orthop Relat Res* 2018; **476**(4): 754-63.
- 519 27. Wouw Avd. Advocating a holistic approach for sport injury prevention and rehabilitation.  
520 *British Journal of Sports Medicine* 2023; **57**(14): 895-6.
- 521 28. Bolling C, Delfino Barboza S, van Mechelen W, Pasman HR. Letting the cat out of the bag:  
522 athletes, coaches and physiotherapists share their perspectives on injury prevention in elite sports.  
523 *British Journal of Sports Medicine* 2020; **54**(14): 871-7.
- 524 29. Jan E, Daniel L, Michael D, Michel DH, Anne Marte P. Communication quality between the  
525 medical team and the head coach/manager is associated with injury burden and player availability in  
526 elite football clubs. *British Journal of Sports Medicine* 2019; **53**(5): 304.

527

528

529

530

531

532

533

534

535

536

537

538

539 **Figure Captions**

540 **Figure 1. Themes (Athlete Pain Lens; Exploring & Navigating Pain; The Emotional Toll;**  
541 **Coping, Community & Communication) and codes.** Dark shading – indicates codes that were  
542 present in athletes and physiotherapists. Light shading – indicates codes that were present in athletes  
543 only, No shading – indicates codes that were present in physiotherapists only

544

545

546 **Figure 2. Athlete pain experience themes and subthemes.** The themes for each part of this series  
547 represent a row in the priorities for pain assessment pyramid, this paper presents the bottom row, or  
548 foundation of the pyramid. This comprises the four themes that describe the “athlete pain” experience  
549 alongside the constituent subthemes. The middle row contains the three themes that describe the  
550 “athlete pain assessment” experience that will be presented in part two of this series. In the top row,  
551 the “priorities for future athlete pain assessment” themes and subthemes are to be presented in part  
552 three and will therefore build on the themes from the previous two papers.

553

| <b>PARTICIPANTS</b>     | <b>N</b> | <b>FEMALE</b> | <b>MALE</b> | <b>SPORT (N)</b>                                                                                                                        | <b>COMPETITION<br/>LEVEL (N)</b>                                                        | <b>PHYSIOTHERAPY<br/>BACKGROUND (N)</b> | <b>ATHLETE<br/>BACKGROUND (N)</b>                |
|-------------------------|----------|---------------|-------------|-----------------------------------------------------------------------------------------------------------------------------------------|-----------------------------------------------------------------------------------------|-----------------------------------------|--------------------------------------------------|
| <b>ATHLETES</b>         | 12       | 5             | 7           | Athletics (5) Tag Ruby (1)<br>Field Hockey (1) Soccer (2),<br>Cycling (1) Mixed Martial<br>Arts (1) Gaelic Football &<br>Basketball (1) | Professional/International<br>(1) Semi-Professional (2)<br>Elite Amateur (9)            | Yes (5)<br><br>No (7)                   | NA                                               |
| <b>PHYSIOTHERAPISTS</b> | 4        | -             | 4           | Athletics (1), Rugby (1),<br>Gaelic Football & Hurling (2),<br>Mixed Sports in Private<br>Practice (3)                                  | Professional/International<br>(2) Mixed Competition<br>level in Private Practice<br>(3) | NA                                      | Current Athletes (2)<br><br>Retired Athletes (2) |

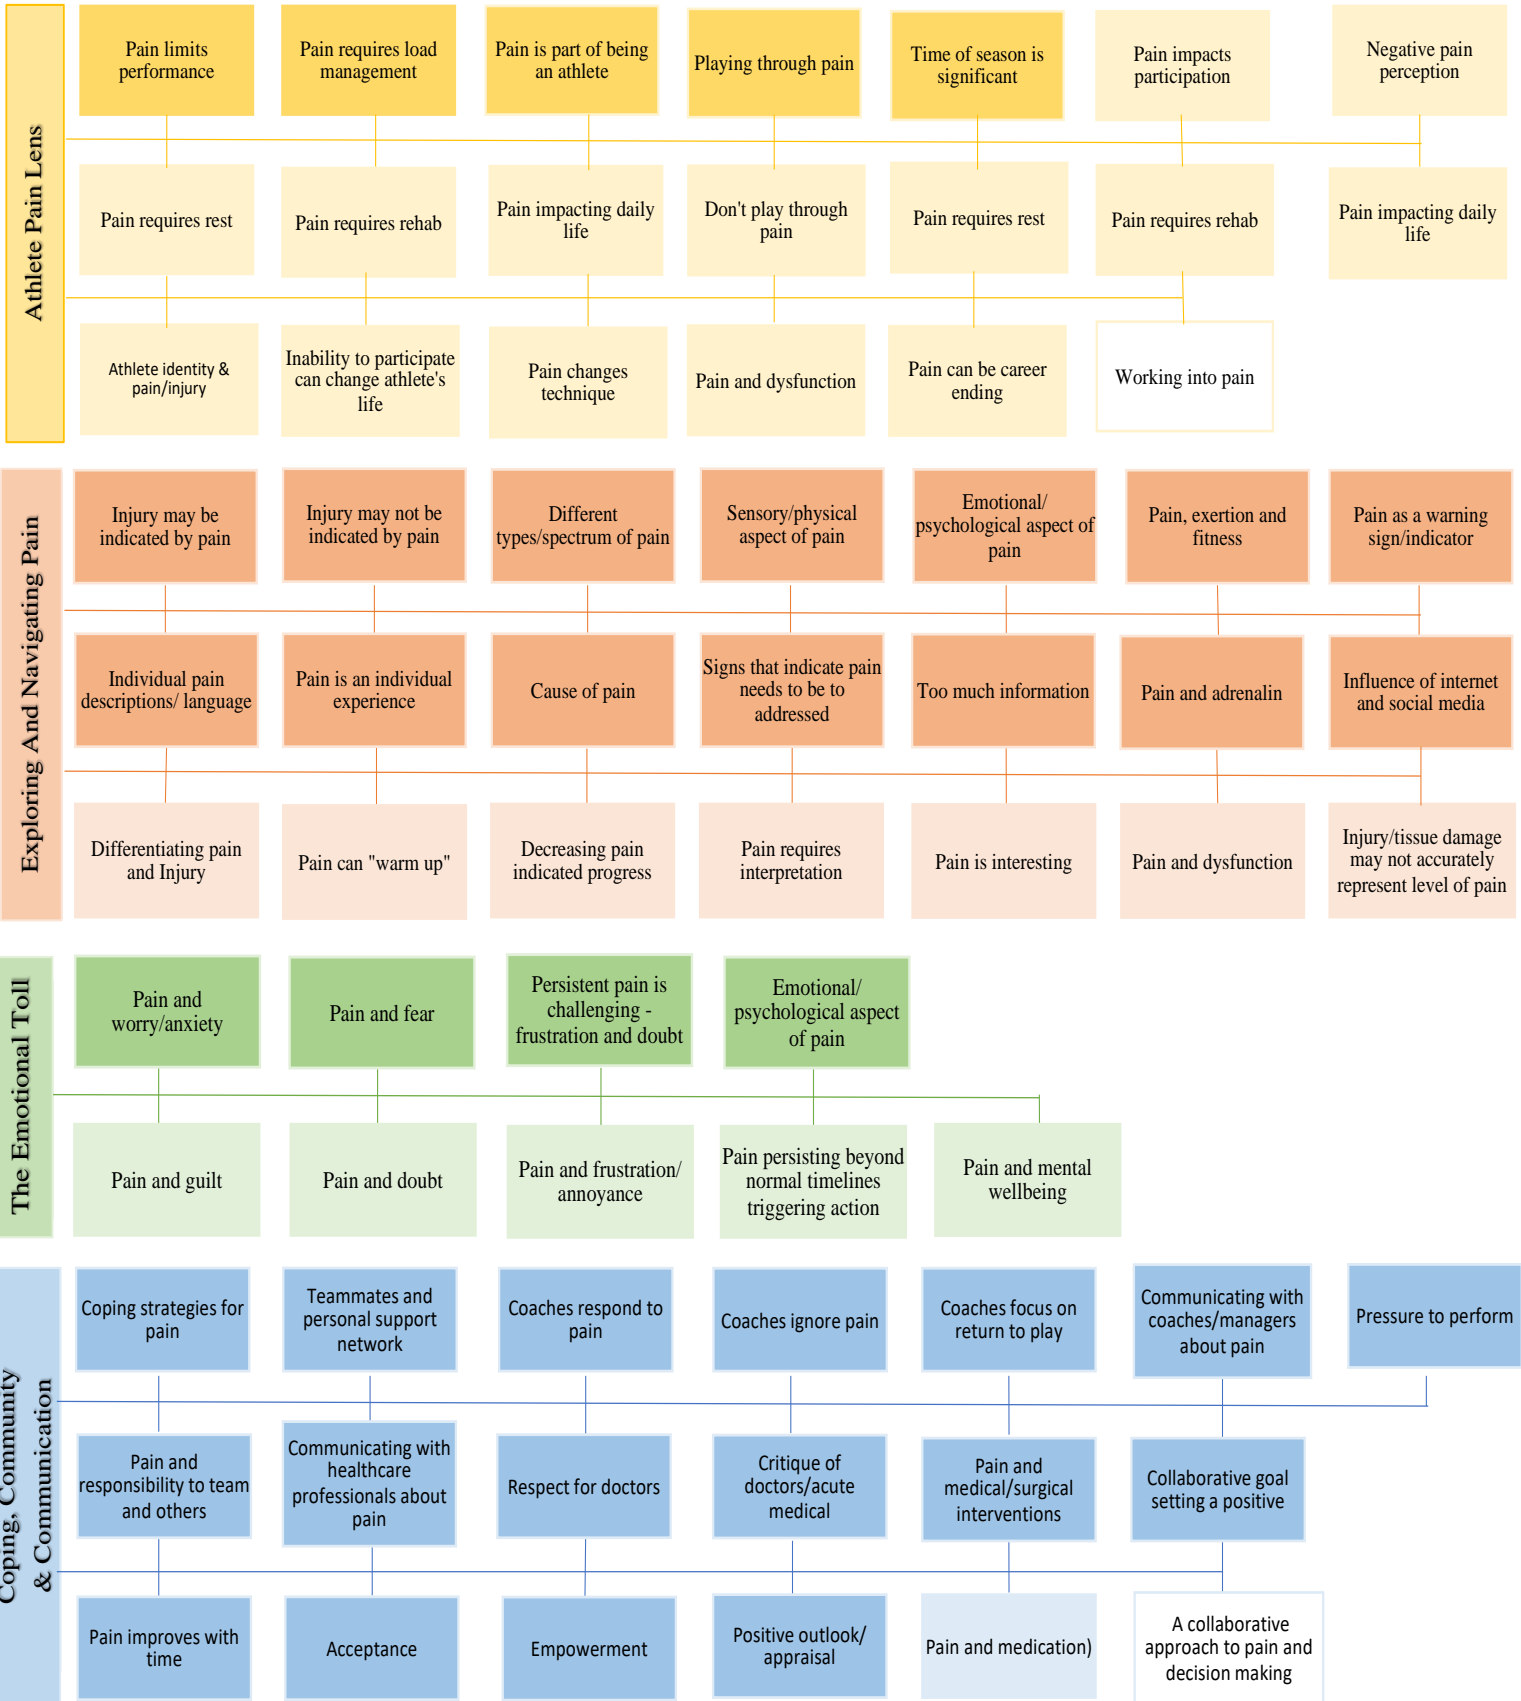



# Sports-Related Pain Themes & Subthemes

## Athlete Pain Lens

Pain is part of being an athlete

Pain shapes the life of an athlete

## Exploring & Navigating Pain

The sports-related pain spectrum

Making sense of pain

## The Emotional Toll of Pain

Challenging emotions

The impact of time

## Coping, Community & Communication

Coping with pain

Influence of community & support network

Communication - the broken key
