1 **Title:** Exploring athlete pain and pain assessment experiences and priorities; A three part qualitative  
2 series of athlete and physiotherapist interactions.  
3 Part One. “Through their eyes” - Athlete & physiotherapist pain experiences and perspectives.

4 **Authors**

5 Ciarán Purcell<sup>1,2,3,4,5,6</sup> Caoimhe Barry Walsh<sup>3</sup> Garrett Van Oirschot<sup>1,2</sup> Brona M Fullen<sup>1</sup> Tomás Ward<sup>6</sup>  
6 Brian M Caulfield<sup>1,2</sup>

7 <sup>1</sup>*School of Public Health, Physiotherapy and Sports Science, University College Dublin, Dublin, Ireland*

8 <sup>2</sup>*Insight SFI Research Centre for Data Analytics, Dublin, Ireland*

9 <sup>3</sup>*School of Allied Health, University of Limerick, Limerick, Ireland*

10 <sup>4</sup>*Physical Activity for Health Research Cluster, University of Limerick, Limerick, Ireland*

11 <sup>5</sup>*Sports and Human Performance Centre, University of Limerick, Limerick, Ireland*

12 <sup>6</sup>*Ageing Research Centre, University of Limerick, Limerick, Ireland*

13

14

15

16

17

18

19

20

21

22

**NOTE: This preprint reports new research that has not been certified by peer review and should not be used to guide clinical practice.**

23 **Abstract**

24 *Objectives:* To explore upper and lower limb athlete pain experiences and perceptions and facilitate  
25 dialogue and shared understanding between athletes and sports physiotherapists.

26 *Design:* Qualitative Research using a hermeneutic phenomenological approach.

27 *Methods:* We carried out focus groups comprising a deliberate criterion sample of athletes and  
28 physiotherapists using a constructivist perspective. We developed a topic guide using an established  
29 step-by-step approach. Using reflexive thematic analysis, we developed codes, candidate themes and  
30 finalised themes iteratively. We applied a critical friend approach to add depth to analysis. Our paper  
31 follows the consolidated criteria for reporting qualitative research (COREQ) guidelines. *Results:* We  
32 completed five focus groups, comprising twelve athletes (five female, seven male) and four sports  
33 physiotherapists (four male) including one successful pilot of two athletes. Four final themes (I-IV)  
34 and nine subthemes (a-i) were developed; I) Athlete Pain Lens ( a - pain is part of being an athlete, b -  
35 pain shapes the life of an athlete) II) Exploring And Navigating Pain (c- the athlete pain spectrum, d-  
36 making sense of pain) III) The Emotional Toll of Pain (e - challenging emotions, f - the impact of  
37 time) IV) Coping, Community and Communication (g - coping with Pain, h - influence of community  
38 and support network, i - communication-the broken key).

39 *Conclusion:* We explored athlete pain experiences and perspectives through engaged conversations  
40 with athletes and physiotherapists. Athletes often struggle to understand and manage their pain, and it  
41 is crucial for everyone in the sports community to recognize and adjust to these challenges.

42 **Keywords;** ‘Pain Perception’, ‘Musculoskeletal Pain’, ‘Athletic Injuries’ ‘Athletic Performance’  
43 ‘Focus Groups’ ‘Sports Medicine’

44

45

46

47

## 48 **Introduction**

49 The value and clinical utility of a comprehensive biopsychosocial, multidimensional approach to pain  
50 has been firmly established in the general population.<sup>1</sup> Pain research and practice with athlete  
51 populations is continually evolving with the International Olympic Committee (IOC) advising a  
52 multidimensional approach to athlete pain that goes beyond traditional structure-based understanding  
53 to include aspects of pain perception and experience across five key domains: neurophysiological,  
54 biomechanical, affective, cognitive, and socioenvironmental.<sup>2</sup> Psychosocial aspects such as history of  
55 stress and coping responses have been linked with injury rates.<sup>3</sup> Furthermore, sports-specific  
56 sociocultural aspects such as attitudes and culture encouraging athletes to be “tough” and “stay in the  
57 game” have been linked to injury risk, injury rates and timely access to healthcare and treatment. The  
58 context of the pain experience has been highlighted as a key component of contemporary pain science  
59 where the same pain experience may be interpreted as stressful or alarming in one context and as a  
60 helpful indicator to manage resources in another.<sup>4</sup>

61 Recent literature has harnessed the athlete’s voice to explore and address complex topics within sport  
62 which are often multidimensional with qualitative methods being used to highlight how coaches,  
63 physiotherapists and athletes perceive an injury.<sup>5</sup> Building on these insights, the role of context in the  
64 implementation of injury prevention and rehabilitation among athletes has been established, thereby  
65 facilitating an enhanced understanding and providing practical guidance.<sup>6,7</sup> Despite developments in  
66 sports injury prevention and rehabilitation, understanding and managing the specific entity of “athlete  
67 pain” experiences within sport remains problematic for athletes and clinicians alike. Traditionally,  
68 qualitative research has focused on the separate experiences of athletes and clinicians when it comes  
69 to pain, much of which has focused on low back pain.<sup>8,9</sup> To truly understand the “athlete pain”  
70 phenomenon, there is a need to gather athletes’ and physiotherapists’ shared definitions and  
71 experiences of pain in the context of multidimensional and contemporary pain understanding. There is  
72 a need, therefore, for focus groups comprised of both athletes and physiotherapists, to facilitate the  
73 open sharing of perspectives and ideas to develop a more comprehensive understanding of athlete  
74 pain experiences of the upper and lower limb.

75

76 This paper is the first in our three-part series investigating athlete and physiotherapist experiences and  
77 future priorities with relation to athlete pain and athlete pain assessment. This paper, part one of the  
78 series, will focus on the experiences and perceptions of athlete pain. We aimed to explore athlete and  
79 sports physiotherapist experiences and perspectives of upper and lower limb pain in a sporting context  
80 through mixed focus groups facilitating dialogue, interactions and shared understanding.

## 81 **Methods**

82 We conducted a qualitative study with mixed focus groups that combined athletes and sports  
83 physiotherapists. Our paper follows the consolidated criteria for reporting qualitative research  
84 (COREQ) guidelines.<sup>10</sup>

85 As a sports physiotherapist and clinician my (CP) move to the field of research is one inspired by both  
86 pragmatism and constructivism. My primary motivation stems from investigating solutions to real-  
87 world problems and queries from the clinic where the best method is often the one that works. I  
88 recognise the need for hearing the patient's (athlete's) voice. My doubts, assumptions and beliefs  
89 drive my position of a value-driven axiology.<sup>11</sup>

90 As the primary interviewer I recognise that being a sports physiotherapist and PhD researcher will  
91 influence the dynamic of discussions, participants may respond and react to this accordingly.<sup>12</sup> I am  
92 unavoidably enmeshed, and I embrace this to understand athlete and clinician upper and lower limb  
93 pain experiences with a reflexive approach.<sup>13</sup> Alongside eight years of clinical experience assessing  
94 and treating athletes I have some qualitative research experience gained through an MSc in sports  
95 physiotherapy. GvO (male) PhD candidate and sports physiotherapist with seventeen years of  
96 experience acted as moderator for the first two focus groups. BC, a Professor in physiotherapy with  
97 twenty years of research experience much of which in the area of sport, movement and assessment  
98 acted as a neutral observer for the first session. CBW, Physiotherapist and PhD researcher in the field  
99 of chronic conditions with experience in the conduct of focus groups, acted as a critical friend for the  
100 qualitative analysis. We took a hermeneutic phenomenological, pragmatic approach to exploring

101 athlete and physiotherapist lived experiences. We viewed perceptions of athlete upper and lower  
102 limb pain and pain assessment from a constructivist perspective.<sup>12</sup> Our research team took a  
103 pragmatic approach and drew on the relevant knowledge from elements of empirico-analytical,  
104 interpretive and critical research paradigms.<sup>14</sup>

105 We recruited a deliberate criterion-based sample of athletes and sports physiotherapists. We sought  
106 athletes spread across multiple sports of varying ages, genders and competition levels, with  
107 experience of an upper or lower limb pain episode requiring sports physiotherapist assessment within  
108 the last year. We recruited sports physiotherapists, with 3 or more years' experience of working with  
109 athletes as part of their weekly caseload across a variety of sports and clinical settings. Our initial  
110 successful pilot focus group of two athletes was followed up with four focus groups combining  
111 athletes and physiotherapists in line with methodological recommendations and similar studies to  
112 facilitate interaction through dialogue and capture various perspectives in a shared space.<sup>15,16</sup> We used  
113 a reflexive sampling strategy with data collection and analysis following each focus group informing  
114 the total sample size. Recruitment ceased when we generated no new concepts. The notion of data  
115 saturation has been contested given that data and themes are generated through interpretation and  
116 there can be no objective point at which no new themes “emerge” in an active constructivist  
117 approach.<sup>17</sup> Therefore we ceased sampling when sufficient depth of information on athlete pain  
118 experience and athlete-physiotherapist pain assessment experience was gathered.

119 We recruited athletes through university sports clubs and local sports clubs' email and other  
120 communication channels. We contacted sports physiotherapists registered with the Irish Society of  
121 Chartered Physiotherapists Sports and Exercise Medicine Group (CPSEM) working across a variety  
122 of sports and settings via the CPSEM email channels and networks. We offered participants their  
123 preference of face-to-face and online (zoom) focus group settings (which were run separately).

124 Ethical permission was granted for our study by the UCD Human Research Ethics Committee. (LS-  
125 22-40-Purcell-Caulfield) We sent participants a pre-participation questionnaire to capture  
126 demographics, sport, context and information regarding previous pain and injury. We asked

127 physiotherapists about their experience working in sport and their additional qualifications alongside  
128 any current or prior sports participation. We developed a topic guide/question route (Appendix A)  
129 using an established step-by-step approach which included: brainstorming, ordering, timing and  
130 phrasing of questions, obtaining feedback from peers, revising and piloting.<sup>18</sup> The topic guide moved  
131 from broad questions concerning athlete pain understandings and experiences to thoughts and  
132 reflections on current pain assessment practice before identifying priorities for an athlete upper and  
133 lower limb pain assessment framework. Questions were open and encouraged interaction between  
134 participants. We altered the sequencing of questions slightly in subsequent focus groups in line with  
135 an iterative and reflexive approach.<sup>19</sup> We allocated two hours for the sessions to ensure enough time  
136 for all components. We set ground rules establishing confidentiality, equity and respect for diverse  
137 views and opinions before each group. We moderated the power imbalance between physiotherapists  
138 and athletes by emphasising the importance of the athlete voice and asking for athletes' opinions to be  
139 shared before clinicians. Where possible we ensured athletes and physiotherapists who previously  
140 worked together were separated. As moderator, GvO assisted CP with the first two focus groups to  
141 ensure all voices were heard and took field notes of the setting and context. GvO prompted CP  
142 regarding any outstanding IOC Athlete Pain domains for consideration throughout the focus group.<sup>2</sup>

143 We completed the transcription verbatim and transcripts were checked against the audio recordings  
144 for accuracy. The full, uncoded and anonymised set of transcripts has been published in an online data  
145 repository. (10.17632/t47tw94mzd.) We chose reflexive thematic analysis as it was congruent with  
146 both our data collection and epistemological position.<sup>13</sup> Thus, data analysis began immediately after  
147 the pilot focus group informing the sampling procedure, data collection and analysis for subsequent  
148 focus groups in an iterative fashion.

149 CP read transcripts in their entirety and added initial observations and notes. CP carried out Initial  
150 coding of the entire transcripts (both semantic and latent). One-third of the transcripts were given to a  
151 CBW to code independently. We discussed, compared and refined initial codes using a critical friend  
152 approach to incorporate breadth and variation in experiences and perspectives.<sup>20</sup>

153 CP then reread transcripts and updated coding where necessary before codes were compared, with  
154 similar codes being highlighted and grouped to form rough clusters of candidate themes. The team  
155 reviewed candidate themes in relation to each other and in the context of the research question with  
156 consideration given to the data available to support each theme. We merged some themes and  
157 adjusted others at this refinement stage. We developed an initial thematic map of the refined themes  
158 before we applied titles and created a final thematic map. The final thematic map will be presented in  
159 Part Three of this series. (Appendix A)

160 In Part One of this series, we report on data primarily from questions focused on athlete pain  
161 experience. In Part Two we use data from questions focused on athlete pain assessment. For the third  
162 and final part of the series, we draw data predominantly from questions focused on future priorities  
163 for pain assessment alongside the nominal group technique. Additionally, we offer an integrated view  
164 of what we have learned from the series alongside practical take-home advice.

165

## 166 **Results & Discussion**

167

### 168 **Table 1 – Participant Demographics inserted here**

169

170 Participant demographics are summarised in Table 1. Five out of the twelve athletes who participated  
171 in the focus groups had a background in physiotherapy practice (either as physiotherapy students or as  
172 physiotherapists where sport was a significant portion of their practice). Similarly, all physiotherapists  
173 were either current or previous athletes. The mix of backgrounds facilitated an engaged and deep  
174 discussion of both athlete and physiotherapist perspectives beyond that possible with groups of either  
175 athletes or physiotherapists alone. Athletes and physiotherapists empathised with each other, validated  
176 experiences and then asked questions to explore deeper meanings.

177 During the data analysis process, we assigned athletes alphanumeric participant IDs beginning with  
178 the letter “A” and physiotherapists alphanumeric IDs beginning with “P”. Athletes and  
179 physiotherapists were talking about and experiencing the same concepts so we merged the data for  
180 coding and analysis. Participant IDs were known only to CP, the lead researcher. Once participant IDs  
181 were allocated and analysis was complete all records of participant information were deleted ensuring  
182 anonymity. Subsequent analysis was completed to identify codes that were present in (i) athletes only,  
183 (ii) physiotherapists only and (iii) codes that were present in both athletes and physiotherapists. All  
184 final themes exploring athlete pain and athlete pain assessment included a mixture of codes from all  
185 three categories (i, ii and iii above). Figure 1 displays the finalised themes and the codes assigned to  
186 each theme. Figure 2 is a thematic map of the themes and subthemes relevant to athlete pain.

187

188 **Figure 1– Themes and codes inserted here.**

189

190 **Figure 2 – Athlete Pain Themes & Subthemes inserted here**

191

192 **The Athlete Pain Lens**

193

194 *Pain is part of being an athlete*

195 Participants shared how pain is an inherent aspect of being an athlete and helps shape their identity.  
196 The interaction between pain, exertion and fitness explains some of the enmeshed experiences with  
197 athletes acknowledging that pain or muscle soreness can be a sign of effort towards the attainment of  
198 fitness. In line with contemporary research, playing through pain whether it be exertion-related or  
199 otherwise was commonplace behaviour reported by both sports physiotherapists and athletes and part  
200 of the athlete experience, albeit with potential consequences. The main concern athletes had was the



201 impact of pain on their performance particularly during competitive parts of the season.

202 Physiotherapists also acknowledged the impact that the time of the season has on pain behaviours.

203 *“I find that you live with pain. It’s not that you wait for the day for pain to come or go.”*

204 *– A01*

205 *“I’m happy to run through pain all summer and just my only worry is that it impacts*

206 *performance.” – A08.*

207 *“Because depending on time of season, what’s coming up, .. changes someone’s, maybe not*

208 *how they experience pain but certainly how far they’re willing to take it.” – P04*

209

210 ***Pain impacts and shapes the life of an athlete.***

211 Athletes and Physiotherapists alike defined pain as something that influences an athlete’s ability to

212 participate and their performance capacity within their sport. Adding insult to injury, athletes

213 described how pain also impacts their everyday life outside of their sport with the combination of the

214 physical and emotional experience having the potential to influence their identity. Previous research

215 has documented how the levity of the impact of pain on daily life and mental wellness can even force

216 athletes to contemplate their future in sport, something one athlete in this study resonated with.<sup>21</sup>

217 *“I suppose physical pain can often translate into being an emotional pain, not being able to*

218 *participate can change the life of an athlete.” – A04*

219 *“It happens me all day, every day, there’s times that I limp because of it and I can’t walk. I’ve*

220 *had to adjust my lifestyle. I can’t wear certain shoes, I can’t just ..run for a bus I need a good long*

221 *warm up and I am meant to be an athlete.” – A08*

222 *“I’m able to run through it but it causes me so much pain that I contemplate retiring.” – A08*

223

## 224 **Exploring And Navigating Pain**

225 Athletes experience a variety of unique pain encounters. They interpret and learn about their pain in  
226 an effort to determine whether each pain episode is part of the normal athlete pain experience or if it  
227 is associated with potential injury and subsequently warrants action.<sup>22,23</sup> Pain is neither predictable nor  
228 repeatable and the abundance of available information through the internet and various sources is  
229 often more of a hindrance than a help, as discussed by coaches of Generation Z athletes who appear to  
230 have more competition for their attention than previous generations.<sup>24</sup> All of these aspects contribute  
231 to a complex phenomenon that is not easily understood and warrants greater attention, appreciation  
232 and representation.

233

### 234 *The athlete pain spectrum.*

235 In line with contemporary research, pain experience existed along a spectrum for athletes and  
236 physiotherapists alike who described a variety of pain presentations from routine training-related  
237 muscle soreness, to “niggles”, to pain that is more sinister in nature and may be a cause for concern.<sup>25</sup>  
238 Pain perception has both sensory (physical) and emotional (psychological) aspects and participants  
239 described how they were influenced by a multitude of sports-related activities from a routine warm-up  
240 to the rush of adrenalin and intense focus experienced when competing.<sup>23</sup> This situational and  
241 contextual pain perception phenomenon served the purpose of deferring the pain experience and  
242 facilitating athletes' performance during competition.

243 *“It kind of has physical implications and psychological as well yeah”. – A11*

244 *“For the majority of anything from a niggle to an injury, if you warm up you can still run on*  
245 *it.” – A01*

246 *“The adrenaline of it all takes over I’m able to finish the rep or finish the race but as soon as*  
247 *I stepped off the track, I said to my coach on both occasions like ah somethings gone wrong.” –*

248 *A08*

249

250

251 ***Making sense of pain***

252 Differentiating between pain and injury is a challenge athletes and physiotherapists often grapple  
253 with. In many cases, injuries may be indicated by pain whilst in others it is not. The amount and  
254 intensity of pain an athlete perceives is influenced by a range of factors beyond tissue damage,  
255 something which athletes and physiotherapists found frustrating to reconcile.<sup>2</sup>

256 *“That is something I definitely struggle with from an athlete perspective is when does pain*  
257 *become something that stops you from competing...as opposed to finding that place where you know*  
258 *it’s safe to continue.” – A12*

259 *“I don’t think it relates to pain, I don’t think pain relates to level of injury, I think it’s a very*  
260 *loose connection to make, especially an acute injury.” – P04*

261 Further exploring the meaning of pain, athletes and physiotherapists acknowledged the individual  
262 nature of pain enlisting individual pain descriptions and language to describe their experiences.  
263 Accurately representing and expressing pain required consideration and time for reflection with  
264 successful communication hinging on the physiotherapist understanding and valuing the athlete's  
265 unique lexicon.

266 *“I think everyone kind of expresses themselves differently.” – A11*

267 *“I suppose as long as your physio understands your language, that’s the key thing and that’s*  
268 *where the relationship with your physio is actually kind of important.” – P03*

269 Fanning the flames of frustration athletes are also faced with an abundance of information from  
270 different sources relating to their pain experience. The availability of large swathes of information  
271 from multiple sources makes it difficult to identify the signal from the noise and operating in a

272 contemporary world adds additional complexity in the form of technology.<sup>24</sup> Athletes and  
273 physiotherapists discussed how the internet, social media and data derived from wearable  
274 technologies may provide a source of helpful information but also often exacerbate the dilemma of  
275 deciphering pain.

276 *“I think people get really confused about the whole situation, they’ve read stuff, they’ve*  
277 *probably been to other practitioners before, they’ve gone around the mill so they can be a little bit of*  
278 *a challenge in terms of figuring out where they are from both a pain point of view, function point of*  
279 *view.” – P03*

280 *“Like Instagram and people influencing you and you know like I was changing exercises*  
281 *every single day trying to solve my pains ... the stress and the thought process.” – A07*

282 Despite the challenges, athletes valued the protective role pain plays and were intrigued to learn more  
283 both about, and from, their pain. Pain acted as a warning sign or indicator that athletes and  
284 physiotherapists used when deciding which pain and load management strategies to apply.

285 *“But for me, it’s kind of a feedback mechanism for the injuries to kind of guide me on what I*  
286 *can and can’t do. If the body signals to kind of back off on things and try to kind of use it as a guide*  
287 *or to teach you how far to push things with injuries and stuff.” – A09*

288 *“You know coming up with a plan maybe with your physio to kind of work towards getting*  
289 *back and you know like taking that break that you need to rehabilitate and kind of working towards*  
290 *the next goal.” – A02*

291 *“Rest isn’t always the answer you know there’s an element of loading but where is that sweet*  
292 *spot?” – P01.*

293

294

295 **The Emotional Toll Of Pain**

296 Athletes experience a plethora of emotions that express the challenges and psychological toll of  
297 navigating pain.<sup>23</sup> Guilt, worry, fear, frustration, and doubt are woven into the fabric of athlete pain  
298 experience often arising from the inability to participate and perform in their given sport and the  
299 influence pain has on daily life activities.<sup>5</sup> The appreciation of these emotions tends to progress  
300 insidiously, with time highlighting and heightening the psychological experience of pain.<sup>22</sup>

301 **Challenging emotions**

302 Athletes reported they often feel worried and anxious owing to the lack of certainty of the potential  
303 causes, consequences and outlook of pain. Pain persisting beyond expected timeframes encroached on  
304 everyday life and heightened concerns. Pain and feelings of doubt negatively impacted athletes'  
305 capacity to make sense of and manage their pain effectively. Challenging emotions including fear,  
306 doubt and frustration were often synonymous with athletes' experiences of pain and have previously  
307 been found to impact an athlete's ability to maintain activity levels when injured.<sup>26</sup> Athletes spoke  
308 about how they fear pain intensifying and are acutely aware of the impending impact it may pose on  
309 their ability to participate in their sport. At times, the inertia accompanied by this cocktail of emotions  
310 left athletes feeling guilty for not being more proactive and blaming themselves for their current  
311 situation.

312 *“The fear that it’s going to get worse or feeling like it’s going to stop me from playing.” – A02*

313 *“When you go through the pain for that long you want it to not be there you start to not trust your*  
314 *own perception” – A03*

315 *“But then I do kind of feel bad because if it’s something that happened before, then I know I should*  
316 *have been doing my rehab .. so it’s kind of my fault.” – A01*

317

318

319 **The impact of time on the emotional aspects of pain.**

320 The trial-and-error nature of pain exploration and effective management was often at odds with the  
321 protracted timelines athletes have to make decisions and be ready for their next competition leading to  
322 frustration and anguish. Participants described how repeated pressurised decisions contribute to the  
323 cumulative emotional toll which negatively impacts an athlete’s physical and mental well-being,  
324 reflecting research findings.<sup>21</sup> Athletes discussed the negative impact of pain on their sleep,  
325 contributing to fatigue and further fuelling a negative pain and quality of life cycle.

326 *“Obviously when pain would reach a point that it takes you out of the field of play it can really affect*  
327 *you mentally and it’s difficult to deal with and it can affect all walks of life just away from the sport”*

328 *– A05*

329

330 *“Yes it was really frustrating because it was like a circle of not being able to sleep and that kind of*  
331 *causing disruption ..to feel just tired and generally fatigued throughout the day and then fairly*  
332 *anxious and depressed that you can’t train” – A10*

333

334 **Coping, Community and Communication**

335 ***Coping with pain***

336 Applying transferable skills acquired in their sports, athletes discussed using a variety of coping  
337 strategies including managing their attention and focus and maintaining their fitness and performance  
338 with alternative, non pain-provoking, cross-training modalities. Athletes can use the additional time to  
339 reflect and foster other interests and hobbies away from their sport which may help manage stress, an  
340 important aspect of pain and injury management.<sup>3</sup> Athletes acknowledged the often-unrelenting nature  
341 of the pursuit of excellence within sport and the opportunities afforded during pain and injury.

342 *“Sometimes you just want to ignore pain and just get through it or whatever.” - A05*

343 *“Just kind of did my own thing, kind of eased off..worked around it because I do kind of a broad*  
344 *range of stuff like and almost always work around injuries” – A09*

345 *“You have other parts of your life that you can focus on like you’re able to focus on different types of*  
346 *training .. and like for example I really enjoy gardening so like whenever I’m injured, I tend to go and*  
347 *garden more because well I can’t train but also it’s a really nice outlet for me to relieve some of that*  
348 *stress.” – A08*

### 349 ***Influence of community and support networks***

350 Understanding and managing pain can be a solitary pursuit however athletes identified that they are  
351 part of a wider team and community. Relationships with friends, family and loved ones, teammates,  
352 colleagues, coaches and health care practitioners play a pivotal role in an athlete understanding,  
353 managing and coping with their pain.<sup>7</sup> Emotional support for athletes came from personal  
354 relationships and teammates who were often the most appropriately positioned to offer context-  
355 specific empathy and advice. Conversely, athletes involved in individual sports were acutely aware of  
356 the void of comradery.

357 *“My current partner .. she was just like .. go back and get some sleep and take care of yourself for a*  
358 *few weeks.” – A10*

359 *“The players we all live together they are the ones who would probably check in on you more in that*  
360 *aspect .. asking you from the perspective of how you are feeling about it.” – A05*

361 *“I think it’s better that if you’re in a team sport, you could talk to some of your teammates like A02*  
362 *could. Like it’s sometimes hard on your own.” – A01*

363 Athletes described how they spend a significant amount of time with their coaches with relationships  
364 developing over years in many cases. The support an athlete feels from their coach is inextricably  
365 linked to the coach’s attitude to pain.<sup>5</sup> Participants discussed how some coaches tend to ignore pain,  
366 focusing on return to play and availability whilst others respond to pain acknowledging the impact it  
367 has on the athlete and the strategies needed to best manage it. Physiotherapists acknowledged the

368 integral role coaches and management staff play in managing athlete pain, investing time in  
369 explaining the complexities behind return-to-play timelines and the variable nature of pain that is  
370 unique to each athlete.

371 *“The coaches very rarely ever asked about how are you getting on, how are you dealing with*  
372 *it, it was always just when are you back. So, they don’t tend to look at you as much as a person and*  
373 *ask you about how you are getting on with it and how are you feeling about it.” – A05*

374 *“Because in different scenarios management play a huge role in it like is there somebody that*  
375 *is going to look and say you know, we’ll sit you out this game or you don’t have to train Wednesday*  
376 *but you’re still playing Saturday or trying to get a balance.” – A07*

377 *“I find I spend a lot of time actually educating managers on injuries and the likely timeframes*  
378 *and how that might change depending on how they’re doing.” – P02*

379

380 ***Communication – the broken key.***

381 Central to successful personal, sporting and therapeutic relationships is effective communication  
382 regarding the experience of pain.<sup>7</sup> Physiotherapists and athletes spoke about how they work together  
383 and with other members of an interdisciplinary team at various stages throughout the pain journey.  
384 Adequately representing and expressing pain to clinicians was often challenging for athletes owing to  
385 the time constraints of clinical and sports-based assessments. Participants described how frustration  
386 can build in persisting pain presentations or when the cause of pain is less clear.

387 *“Because I, actually, before I go into a physio, I do write down what I’m going to say,*  
388 *because more often than not I’d leave forgetting to mention things and you’re like, oh god, well it’s*  
389 *gone now and I’m never going to say anything.” – A11*

390 Participants discussed how physicians often sit at the top of the decision-making tree when it comes to  
391 managing athlete pain medically. As a result, some athletes find the decisive nature of these



392 interactions refreshing, providing clarity. In stark contrast, athletes can also find interactions with  
393 physicians limited and reductionist with physiotherapists also echoing this frustration.

394 *“Whenever I feel pain, I go to the Doctor and they confirm what my pain was and I’m*  
395 *reassured that what I felt was real and then I follow the rehab protocol.” – A08*

396 *“That’s very hard .. yes this pain like that thing in my foot I’m like I’ve had this years ..how*  
397 *do you get a sports doc to see that beyond just the MRI and what it shows you?” – A08*

398 *“With the doctor instead of constantly saying to everyone we’ll just MRI your back maybe*  
399 *they start to get a bit better too at knowing who they should be referring for medical imaging because*  
400 *we’re picking up the bloody pieces after it..” – P02*

401 Athletes shared how in sport, the pressure to perform and rapidly return to play, a deep sense of  
402 responsibility to teammates and playing through pain culture can be at odds with the time and space  
403 needed to effectively communicate the pain experience within their support network. Physiotherapists  
404 also noted the effect the team dynamic of sport has on an athlete negotiating their individual pain.

405 *“The team environment and how competitive it was at the time, you couldn’t really say to the*  
406 *management unless it got to a point where like there’s fairly you know something sinister or*  
407 *something” – A07.*

408 *“There is a little bit of a sense of community, teammates and stuff that’s going on as well*  
409 *where ‘who am I letting down?’ ..so you know.” – P03*

410 When communication and the ensuing support are hampered, athletes found that their resources for  
411 coping are reduced and the likelihood of seeking medical and surgical interventions can increase.  
412 Conversely, when communication is effective, collaborative decision-making can occur with  
413 comprehensive pain management plans being devised. This was often accompanied by a more  
414 positive outlook with athletes reporting feelings of acceptance and empowerment as key markers of  
415 moving forward and coping with pain.



440 their pain and manage it more effectively. Part Two of this series will report on the pain assessment  
441 experiences from both the athlete's and sports physiotherapists' perspectives.

442

### 443 **Practical Implications**

- 444 - Pain is part of being an athlete and is influenced by each individual's unique experience and  
445 sporting context
- 446 - There is a significant emotional aspect of the athlete's pain experience which should be  
447 discussed and validated.
- 448 - Interpreting pain experiences and making decisions is a challenge for athletes.
- 449 - Athletes display a variety of coping strategies which are strengthened through effective  
450 communication with their support network.
- 451 - Physiotherapists, coaches and the wider support network must recognise the impact pain has  
452 on athletes' sports performance and quality of life and help athletes understand their pain and  
453 make informed decisions.

454

### 455 **Acknowledgements**

456 A huge thank you to Alison Keogh and Aisling Lacey for their consultation and expertise in  
457 qualitative research methods in sport and exercise.

458

459

460

461

462

## 463 **References**

- 464 1. Lin I, Wiles L, Waller R, et al. What does best practice care for musculoskeletal pain look like?  
465 Eleven consistent recommendations from high-quality clinical practice guidelines: systematic  
466 review. *Br J Sports Med* 2020;54(2):79-86. doi: 10.1136/bjsports-2018-099878 [published  
467 Online First: 2019/03/04]
- 468 2. Hainline B, Derman W, Vernec A, et al. International Olympic Committee consensus statement on  
469 pain management in elite athletes. *Br J Sports Med* 2017;51(17):1245-58. doi:  
470 10.1136/bjsports-2017-097884 [published Online First: 2017/08/23]
- 471 3. Ivarsson A, Johnson U, Andersen MB, et al. Psychosocial Factors and Sport Injuries: Meta-analyses  
472 for Prediction and Prevention. *Sports Medicine* 2017;47(2):353-65. doi: 10.1007/s40279-016-  
473 0578-x
- 474 4. Caneiro JP, Smith A, Bunzli S, et al. From Fear to Safety: A Roadmap to Recovery From  
475 Musculoskeletal Pain. *Physical Therapy* 2022;102(2) doi: 10.1093/ptj/pzab271
- 476 5. Bolling C, Delfino Barboza S, Van Mechelen W, et al. How elite athletes, coaches, and  
477 physiotherapists perceive a sports injury. *Translational Sports Medicine* 2019;2(1):17-23. doi:  
478 10.1002/tsm2.53
- 479 6. Bolling C, Van Mechelen W, Pasma HR, et al. Context Matters: Revisiting the First Step of the  
480 'Sequence of Prevention' of Sports Injuries. *Sports Medicine* 2018;48(10):2227-34. doi:  
481 10.1007/s40279-018-0953-x
- 482 7. Wouw Avd. Advocating a holistic approach for sport injury prevention and rehabilitation. *British*  
483 *Journal of Sports Medicine* 2023;57(14):895-96. doi: 10.1136/bjsports-2022-105695
- 484 8. Wilson F, Ng L, O'Sullivan K, et al. 'You're the best liar in the world': a grounded theory study of  
485 rowing athletes' experience of low back pain. *Br J Sports Med* 2021;55(6):327-35. doi:  
486 10.1136/bjsports-2020-102514 [published Online First: 2020/10/11]

- 487 9. Fawcett L, Heneghan NR, James S, et al. Perceptions of low back pain in elite gymnastics: A multi-  
488 disciplinary qualitative focus group study. *Phys Ther Sport* 2020;44:33-40. doi:  
489 10.1016/j.ptsp.2020.04.003 [published Online First: 2020/05/07]
- 490 10. Tong A, Sainsbury P, Craig J. Consolidated criteria for reporting qualitative research (COREQ): a  
491 32-item checklist for interviews and focus groups. *International Journal for Quality in Health*  
492 *Care* 2007;19(6):349-57. doi: 10.1093/intqhc/mzm042
- 493 11. Saunders M, Lewis P, Thornhill A, et al. "Research Methods for Business Students" Chapter 4:  
494 Understanding research philosophy and approaches to theory development 2019:128-71.
- 495 12. Korstjens I, Moser A. Series: Practical guidance to qualitative research. Part 2: Context, research  
496 questions and designs. *European Journal of General Practice* 2017;23(1):274-79. doi:  
497 10.1080/13814788.2017.1375090
- 498 13. Braun V, Clarke V. Reflecting on reflexive thematic analysis. *Qualitative Research in Sport,*  
499 *Exercise and Health* 2019;11(4):589-97. doi: 10.1080/2159676x.2019.1628806
- 500 14. Fossey E, Harvey C, McDermott F, et al. Understanding and Evaluating Qualitative Research.  
501 *Australian & New Zealand Journal of Psychiatry* 2002;36(6):717-32. doi:  
502 10.1046/j.1440-1614.2002.01100.x
- 503 15. Rushton A, Heneghan NR, Heap A, et al. Patient and physiotherapist perceptions of rehabilitation  
504 following primary lumbar discectomy: a qualitative focus group study embedded within an  
505 external pilot and feasibility trial. *BMJ Open* 2017;7(4):e015878. doi: 10.1136/bmjopen-  
506 2017-015878
- 507 16. Tausch AP, Menold N. Methodological Aspects of Focus Groups in Health Research. *Global*  
508 *Qualitative Nursing Research* 2016;3(0):233339361663046. doi:  
509 10.1177/2333393616630466
- 510 17. Braun V, Clarke V. To saturate or not to saturate? Questioning data saturation as a useful  
511 concept for thematic analysis and sample-size rationales. *Qualitative Research in Sport,*  
512 *Exercise and Health* 2021;13(2):201-16. doi: 10.1080/2159676x.2019.1704846

- 513 18. Kallio H, Pietilä AM, Johnson M, et al. Systematic methodological review: developing a  
514 framework for a qualitative semi-structured interview guide. *J Adv Nurs* 2016;72(12):2954-  
515 65. doi: 10.1111/jan.13031 [published Online First: 2016/05/26]
- 516 19. Moser A, Korstjens I. Series: Practical guidance to qualitative research. Part 3: Sampling, data  
517 collection and analysis. *European Journal of General Practice* 2018;24(1):9-18. doi:  
518 10.1080/13814788.2017.1375091
- 519 20. Smith B, McGannon KR. Developing rigor in qualitative research: problems and opportunities  
520 within sport and exercise psychology. *International Review of Sport and Exercise Psychology*  
521 2018;11(1):101-21. doi: 10.1080/1750984x.2017.1317357
- 522 21. Sanders G, Stevinson C. Associations between retirement reasons, chronic pain, athletic identity,  
523 and depressive symptoms among former professional footballers. *European Journal of Sport*  
524 *Science* 2017;17(10):1311-18. doi: 10.1080/17461391.2017.1371795
- 525 22. Barrette A, Harman K. Athletes Play Through Pain-What Does That Mean for Rehabilitation  
526 Specialists? *J Sport Rehabil* 2020;29(5):640-49. doi: 10.1123/jsr.2018-0426 [published Online  
527 First: 2019/05/17]
- 528 23. Raja SN, Carr DB, Cohen M, et al. The revised International Association for the Study of Pain  
529 definition of pain: concepts, challenges, and compromises. *Pain* 2020;161(9):1976-82. doi:  
530 10.1097/j.pain.0000000000001939 [published Online First: 2020/07/23]
- 531 24. Gould D, Nalepa J, Mignano M. Coaching Generation Z Athletes. *Journal of Applied Sport*  
532 *Psychology* 2020;32(1):104-20. doi: 10.1080/10413200.2019.1581856
- 533 25. Lacey A, Whyte E, O'Keeffe S, et al. The Running Injury Continuum: A qualitative examination of  
534 recreational runners' description and management of injury. *PLOS ONE*  
535 2023;18(10):e0292369. doi: 10.1371/journal.pone.0292369
- 536 26. Fischerauer SF, Talaei-Khoei M, Bexkens R, et al. What Is the Relationship of Fear Avoidance to  
537 Physical Function and Pain Intensity in Injured Athletes? *Clin Orthop Relat Res*  
538 2018;476(4):754-63. doi: 10.1007/s11999.0000000000000085

539 27. Ekstrand J, Spreco A, Bengtsson H, et al. Injury rates decreased in men's professional football: an  
540 18-year prospective cohort study of almost 12 000 injuries sustained during 1.8 million hours  
541 of play. *Br J Sports Med* 2021 doi: 10.1136/bjsports-2020-103159 [published Online First:  
542 2021/02/07]

543

544

545

546

547

548

549

550

551

552

553

554

555

556

557

558

559 **Figure Captions**

560 **Figure 1. Themes (Athlete Pain Lens; Exploring & Navigating Pain; The Emotional Toll;**

561 **Coping, Community & Communication) and codes.** Dark shading – indicates codes that were

562 present in athletes and physiotherapists. Light shading – indicates codes that were present in athletes

563 only, No shading – indicates codes that were present in physiotherapists only

564

565

566 **Figure 2. Athlete pain experience themes and subthemes.** The themes for each part of this series

567 represent a row in the priorities for pain assessment pyramid, this paper presents the bottom row, or

568 foundation of the pyramid. This comprises the four themes that describe the “athlete pain” experience

569 alongside the constituent subthemes. The middle row contains the three themes that describe the

570 “athlete pain assessment” experience that will be presented in part two of this series. In the top row,

571 the “priorities for future athlete pain assessment” themes and subthemes are to be presented in part

572 three and will therefore build on the themes from the previous two papers.

573



**Figure 1 Athlete Pain Themes & Codes**

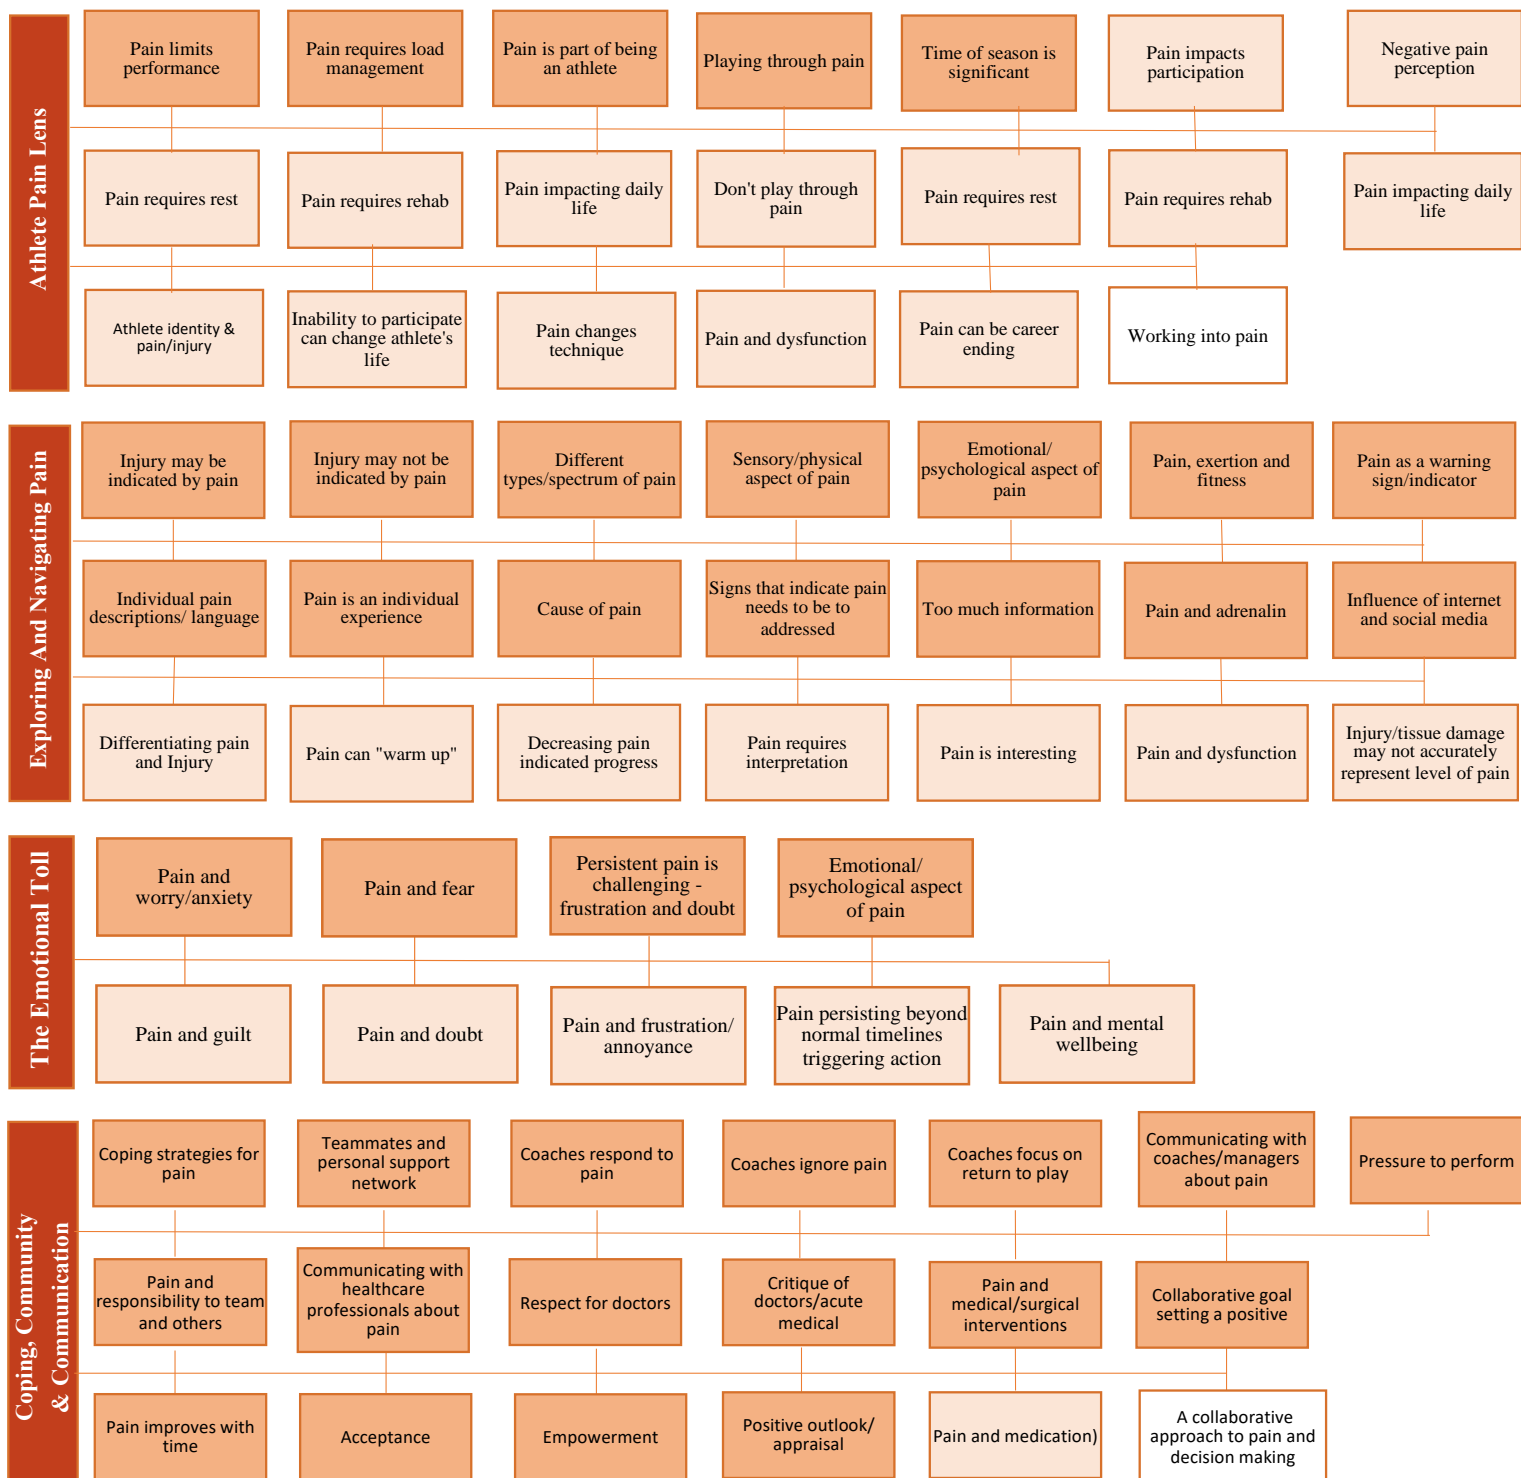

Figure 2 – Athlete Pain Themes and Subthemes (And final thematic Map)

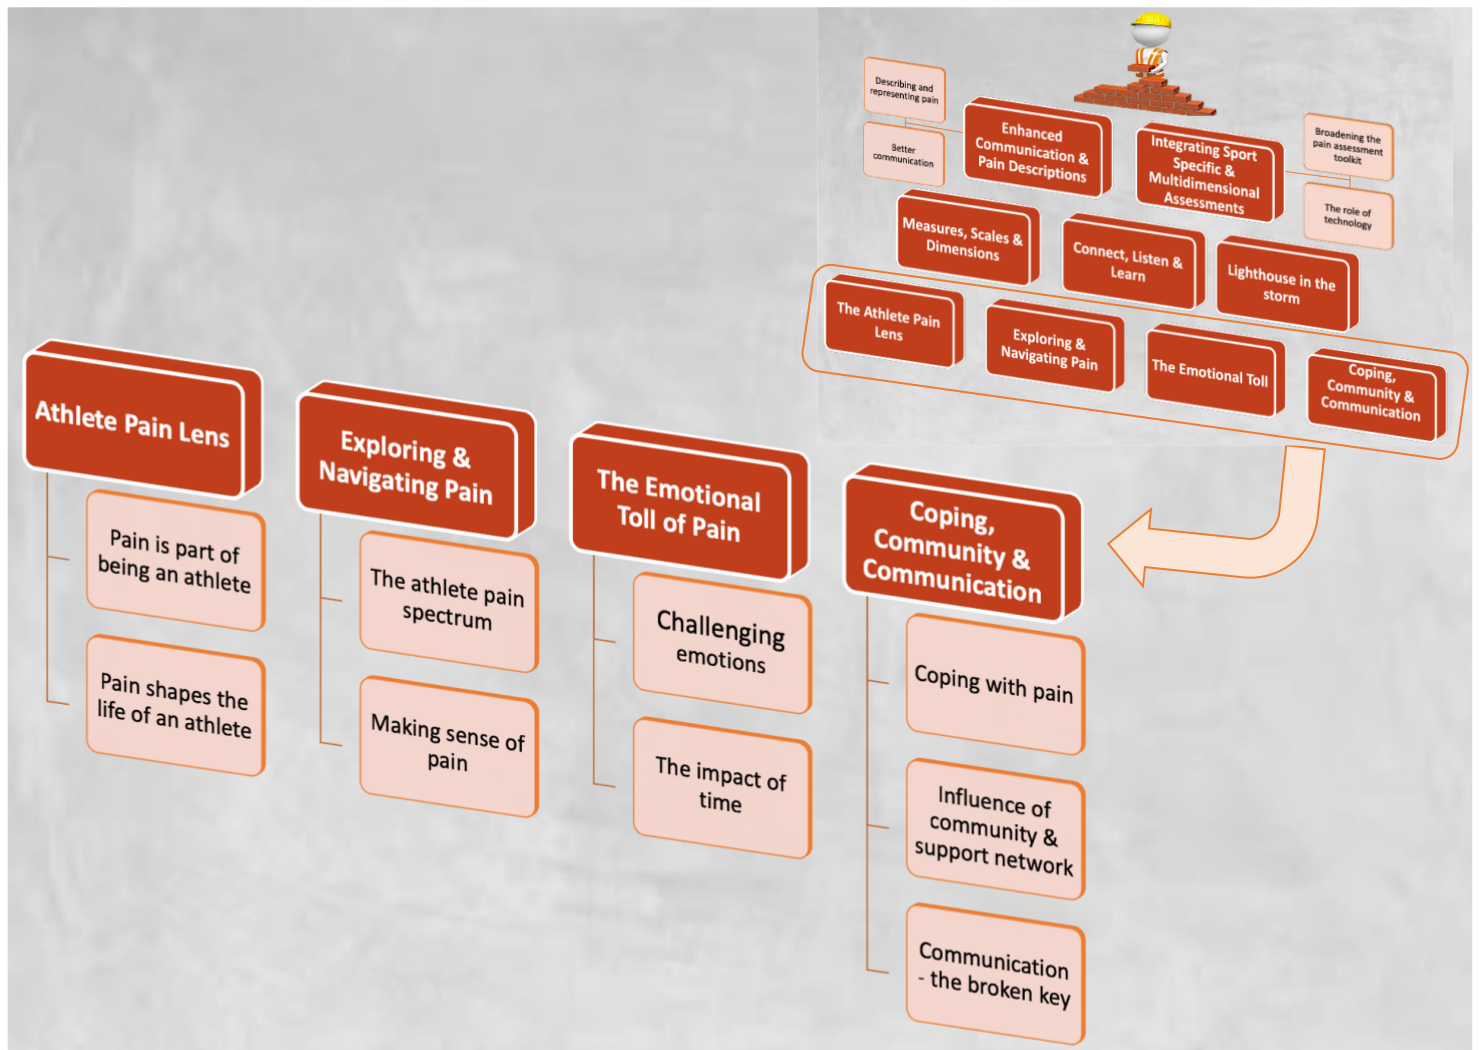

**Table 1 – Participant Demographics**

| <b>PARTICIPANTS</b>     | <b>N</b> | <b>FEMALE</b> | <b>MALE</b> | <b>SPORT (N)</b>                                                                                                            | <b>COMPETITION LEVEL</b>                                                       | <b>PHYSIOTHERAPY BACKGROUND (N)</b> | <b>ATHLETE BACKGROUND</b>                    |
|-------------------------|----------|---------------|-------------|-----------------------------------------------------------------------------------------------------------------------------|--------------------------------------------------------------------------------|-------------------------------------|----------------------------------------------|
| <b>ATHLETES</b>         | 12       | 5             | 7           | Athletics (5) Tag Ruby (1) Field Hockey (1) Soccer (2), Cycling (1) Mixed Martial Arts (1) Gaelic Football & Basketball (1) | Professional/International (1) Semi-Professional (2) Elite Amateur (9)         | Yes (5)<br>No (7)                   | NA                                           |
| <b>PHYSIOTHERAPISTS</b> | 4        | -             | 4           | Athletics (1), Rugby (1), Gaelic Football & Hurling (2), Mixed Sports in Private Practice (3)                               | Professional/International (2) Mixed Competition level in Private Practice (3) | NA                                  | Current Athletes (2)<br>Retired Athletes (2) |
